# Supplementary material
Source: PubMed Central journal article supplement (PMC7655384)
Supplement: 18-00586.pdf [file 18-00586.pdf]

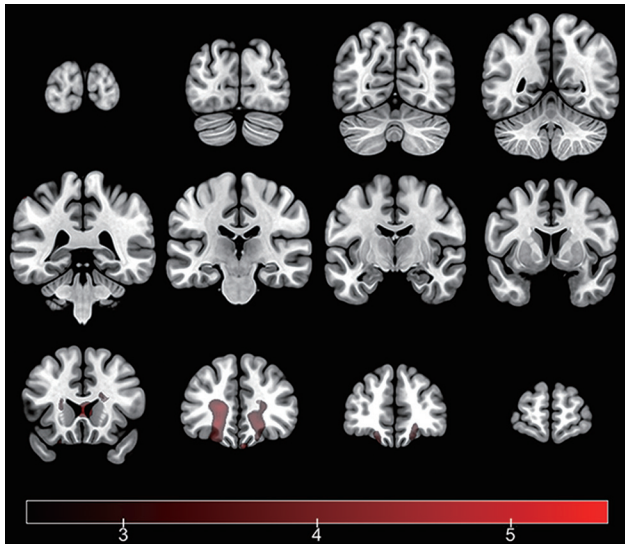

A

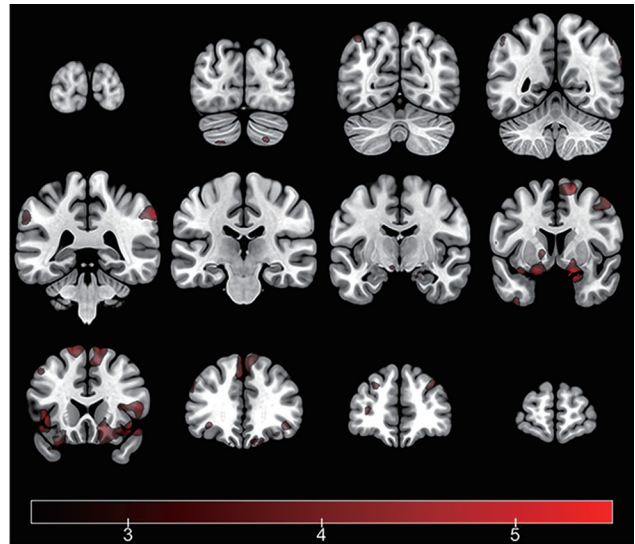

B

**ON-LINE FIGURE.** Coronal representation of average brain activation maps of the healthy control group (A) and the traumatic anosmia group (B) in response to the citral stimuli (1-sample  $t$  test, voxelwise threshold false discovery rate–corrected  $P < .05$ ) ( $t$  values in a color scale). The traumatic anosmia group shows more widespread activation in the orbitofrontal cortex, insula, and multiple bilateral cortical association areas than the healthy control group. The left side of the brain is presented on the left side of the image, according to neurologic convention.

**On-line Table 1: Differences in olfaction-induced brain activation between patients with traumatic anosmia and healthy control subjects**

| Stimulation/Area                   | MNI Coordinates |     |     | Activation Size (Voxels) | T Value |
|------------------------------------|-----------------|-----|-----|--------------------------|---------|
|                                    | X               | Y   | Z   |                          |         |
| Citral                             |                 |     |     |                          |         |
| Left frontal subgyral white matter | -20             | -20 | 46  | 85                       | 4.74    |
| BME                                |                 |     |     |                          |         |
| Left middle temporal gyrus         | -62             | -18 | -10 | 5717                     | 5.99    |
| Right middle temporal gyrus        | 68              | -2  | -14 | 1272                     | 5.80    |
| Left medial frontal gyrus          | -4              | 40  | 48  | 719                      | 4.99    |
| Right middle temporal gyrus        | 70              | -42 | 0   | 683                      | 5.01    |
| Right cerebellum                   | 44              | -42 | 44  | 454                      | 6.00    |
| Left postcentral gyrus             | -52             | -12 | 24  | 481                      | 5.00    |
| Right fusiform gyrus               | 34              | -74 | -12 | 437                      | 4.64    |
| Left middle frontal gyrus          | -42             | 16  | 28  | 380                      | 4.34    |
| Right precentral gyrus             | 60              | -6  | 24  | 204                      | 4.09    |
| Left middle frontal gyrus          | -32             | 16  | 50  | 190                      | 4.13    |
| Right middle frontal gyrus         | 36              | 20  | 42  | 185                      | 4.05    |
| Left uncus                         | -30             | 6   | -46 | 183                      | 4.68    |
| Right inferior temporal gyrus      | 46              | 6   | -50 | 174                      | 4.79    |
| Left middle temporal gyrus         | -34             | -68 | 26  | 164                      | 4.03    |
| Right superior temporal gyrus      | 46              | -46 | 10  | 57                       | 3.81    |
| Left superior parietal lobule      | -24             | -70 | 58  | 57                       | 4.31    |
| Right fusiform gyrus               | 38              | -52 | -18 | 42                       | 3.85    |
| Right middle frontal gyrus         | 48              | 30  | 20  | 30                       | 3.71    |
| Right paracentral lobule           | 6               | -44 | 64  | 25                       | 3.81    |
| Right superior temporal gyrus      | 68              | -28 | 8   | 21                       | 3.80    |
| Right uncus                        | 26              | 2   | -48 | 14                       | 3.60    |
| Left lingual gyrus                 | -14             | -86 | -10 | 13                       | 3.54    |
| Right superior frontal gyrus       | 16              | 48  | 22  | 8                        | 3.58    |
| Left middle frontal gyrus          | -34             | -8  | 64  | 8                        | 3.44    |

**On-line Table 2: Correlations between brain activation and KVSS II score in patients with traumatic anosmia**

| Stimulation/Area            | MNI Coordinates |     |     | Activation Size (Voxels) | T Value |
|-----------------------------|-----------------|-----|-----|--------------------------|---------|
|                             | X               | Y   | Z   |                          |         |
| Citral                      |                 |     |     |                          |         |
| Left fusiform gyrus         | -40             | -42 | -18 | 36                       | 5.58    |
| Right postcentral gyrus     | 22              | -32 | 50  | 18                       | 4.64    |
| Left insula                 | -30             | -24 | 16  | 5                        | 3.95    |
| Left precentral gyrus       | -32             | -16 | 56  | 5                        | 4.13    |
| BME                         |                 |     |     |                          |         |
| Left middle temporal gyrus  | -72             | -18 | -16 | 104                      | 5.46    |
| Left middle occipital gyrus | -32             | -72 | 2   | 48                       | 4.80    |
| Right cerebellum            | 48              | -46 | 44  | 28                       | 4.91    |
| Right middle temporal gyrus | 66              | -2  | -18 | 18                       | 4.40    |
| Left middle frontal gyrus   | -20             | -14 | 50  | 10                       | 4.36    |
| Left insula                 | -36             | -16 | 16  | 6                        | 4.14    |
